# Supplementary material
Source: PubMed Central journal article supplement (PMC6736746)
Supplement: NIHMS1534471-supplement-1.pdf [file NIHMS1534471-supplement-1.pdf]

## Supplementary Materials

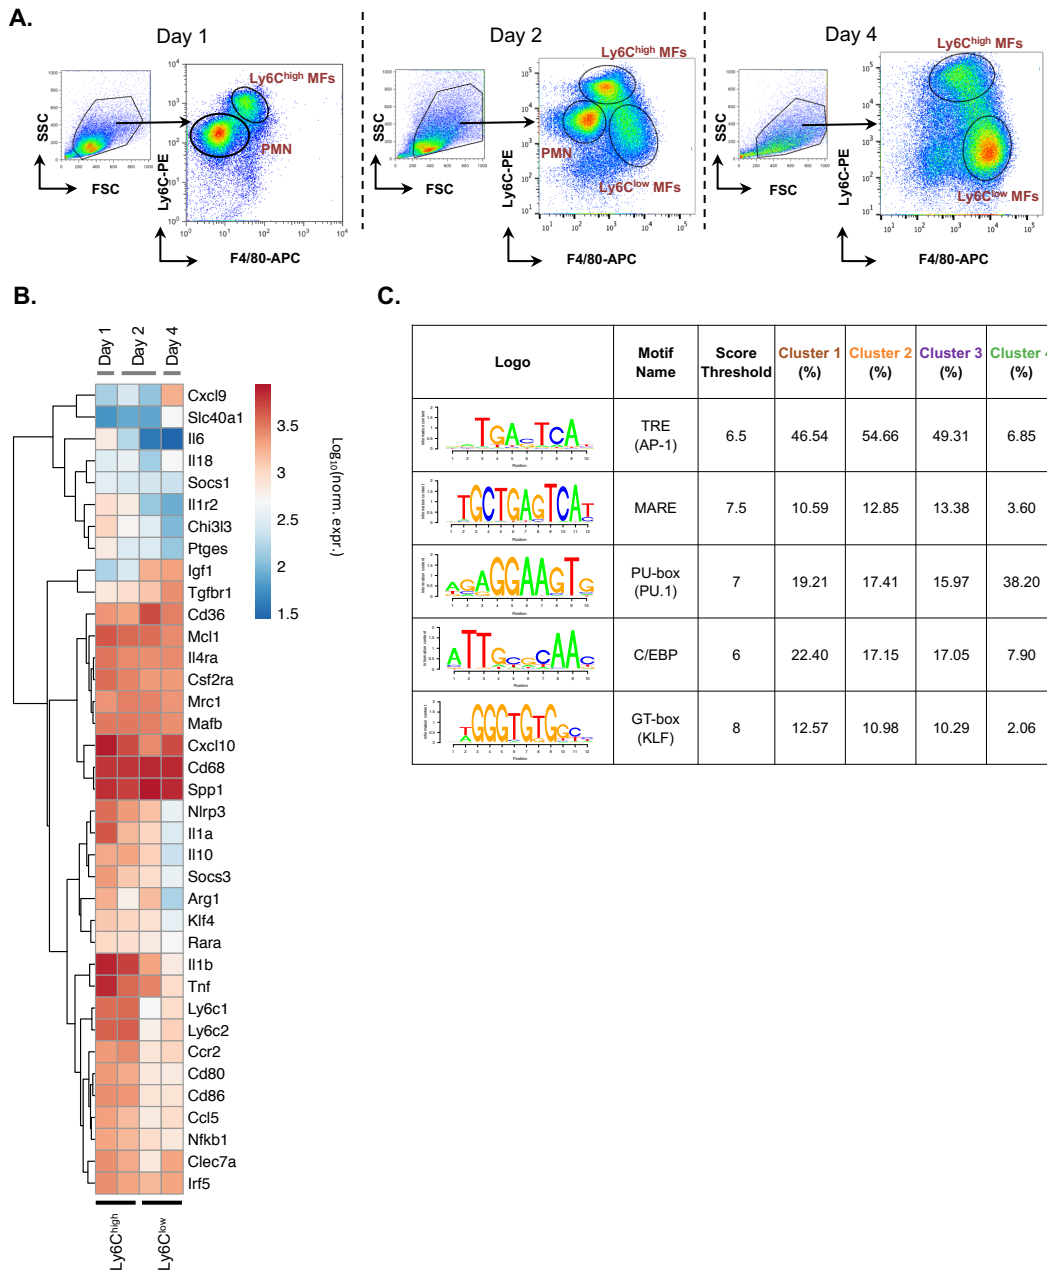

### Supplementary Fig. 1. Gating strategy and ATAC-seq based motif prediction in muscle-infiltrating macrophages.

- FACS gating strategy for the analysis and sorting of macrophage subsets and neutrophils (PMNs) from CTX-injured muscles. Leukocytes were gated on FSC/SSC to discriminate live cells, and then markers for Ly6G, F4/80 and Ly6C were used to isolate them.
- Heatmap showing the expression pattern of key inflammation and regeneration-related genes by regenerating Ly6C<sup>high</sup> and Ly6C<sup>low</sup> muscle-derived macrophages at indicated timepoints post CTX injury. Expression values are visualized as log<sub>10</sub>(normalized expression).
- Motif enrichment in each of the four ATAC-seq clusters from muscle-infiltrating macrophages. Top 5 motifs predicted are shown. The motif matrices used in the analysis are indicated along with percentages of regions having a given motif and the lowered score thresholds.

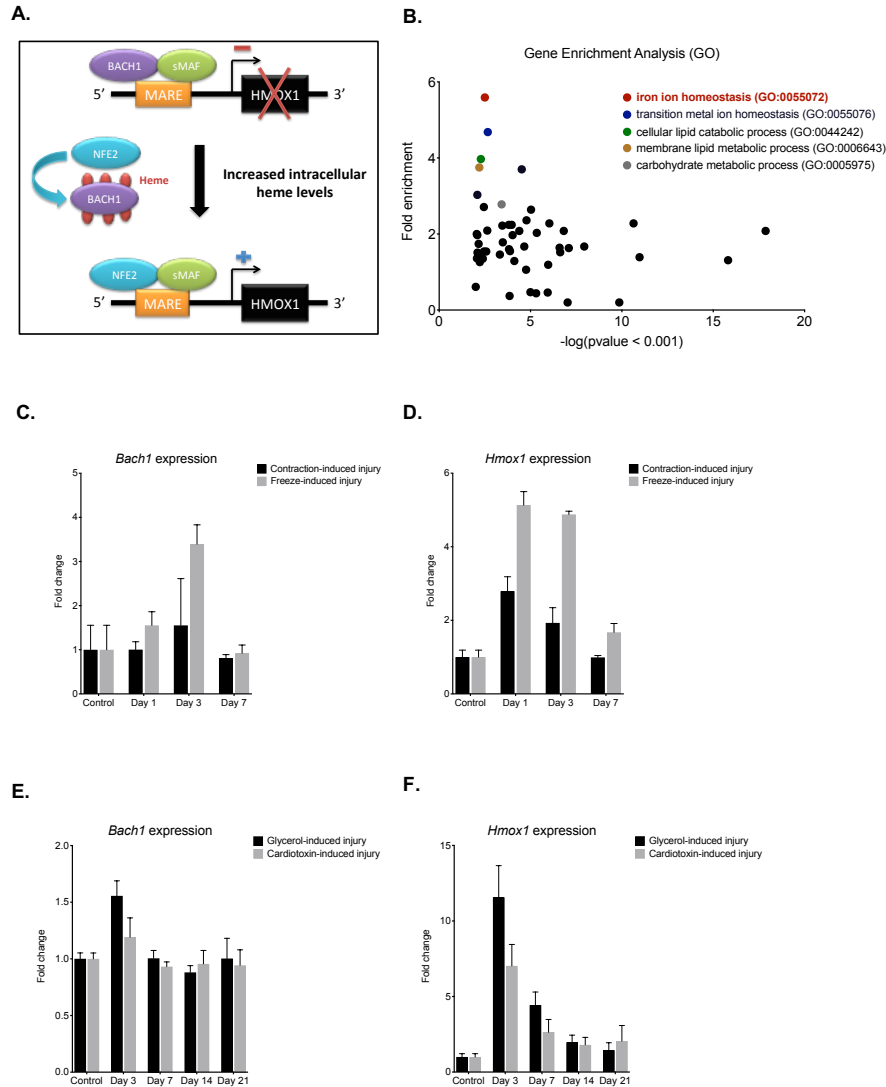

**Supplementary Fig. 2. Gene enrichment analysis of muscle infiltrating macrophages reveals iron homeostasis related pathways.**

- Model describing the regulation of *Hmox1* by BACH1 and heme. Maf-related factors may serve as partners for BACH1. BACH1 occupies MARE enhancers to repress transcription of *Hmox1* gene under normal conditions. An increase in heme levels alleviates BACH1-mediated repression through inhibition of its DNA-binding activity and subsequent nuclear export, making MAREs available for activating Maf complexes.
- Gene enrichment/ontology (GO) analysis of the genes that are differentially expressed as inflammatory Day 1  $Ly6C^{high}$  macrophages differentiate into reparatory  $Ly6C^{low}$  macrophages during muscle regeneration at day 4 post CTX injury. All terms shown have p value < 0.001.
- and D. mRNA expression of *Bach1* and *Hmox1* from publicly available microarray data in contraction and freeze-induced injured muscles at timepoints indicated. Bars indicate fold changes over control.
- and F. mRNA expression of *Bach1* and *Hmox1* from publicly available microarray data in glycerol and cardiotoxin-induced injured muscles at timepoints indicated. Bars indicate fold changes over control.

In all bar graphs, bars represent mean  $\pm$  SEM.

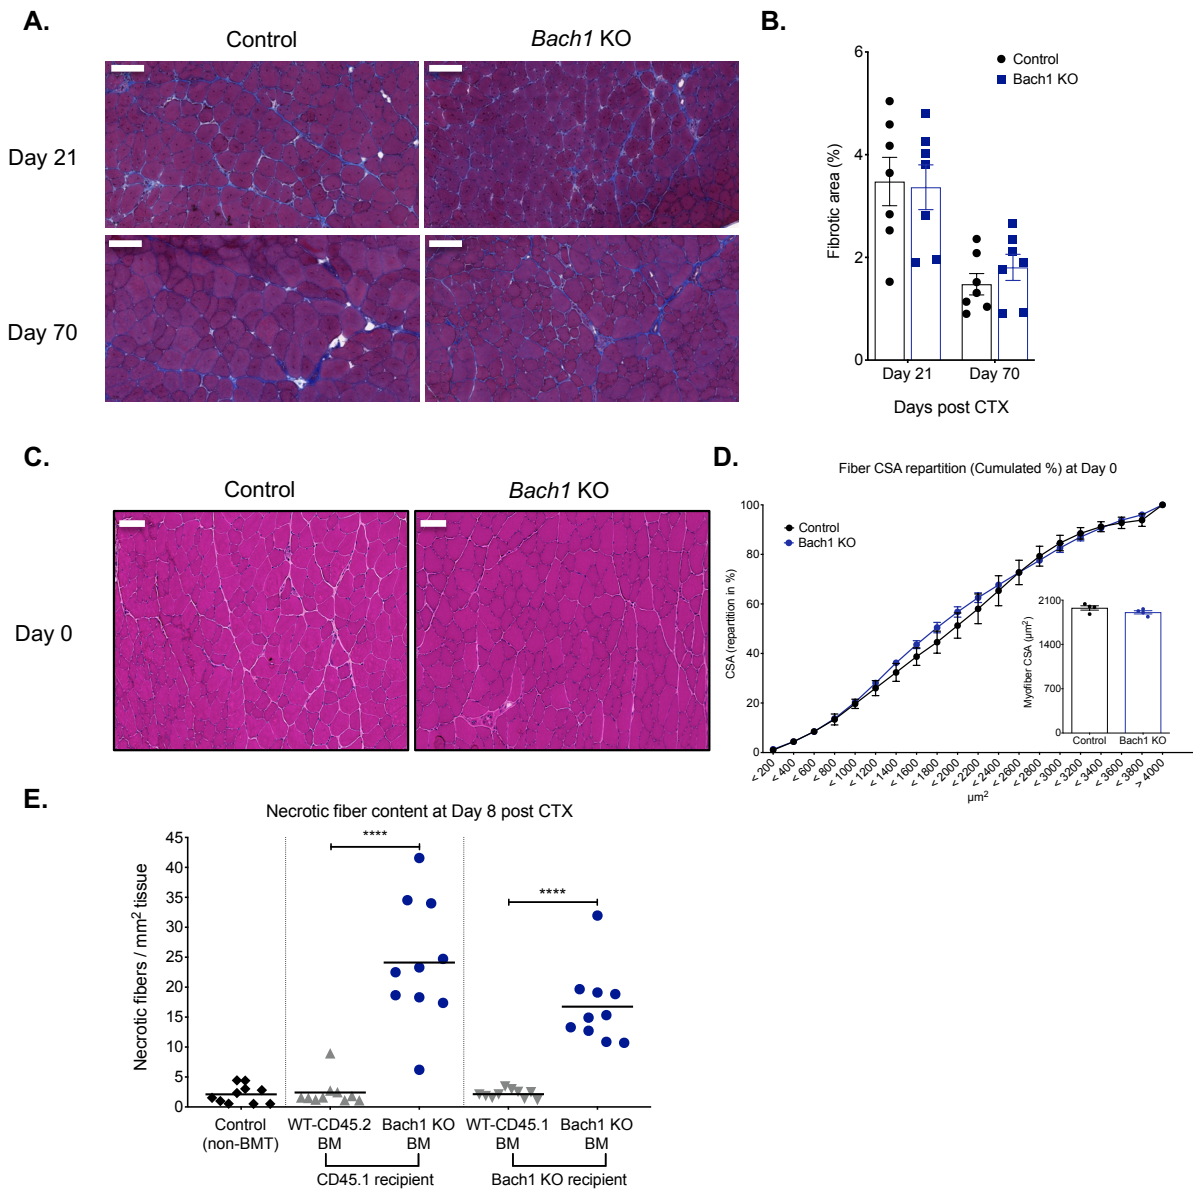

**Supplementary Fig. 3. BACH1 ablation doesn't affect development or muscle growth in uninjured animals.**

- Representative images of Masson's trichrome stained skeletal muscle from WT-control and *Bach1*-KO mice at day 21 and 70 post CTX injury. Scale bars in the upper left represent 100 $\mu\text{m}$ .
- Fibrosis (connective tissue deposition) quantification in WT-control and *Bach1*-KO injured muscles expressed as the percentage of the area of fibrosis over total regeneration area (n=7 per group).
- Representative images of H&E stained skeletal muscle from WT-control and *Bach1*-KO mice prior any injury (day 0) are shown. Scale bars in the upper left represent 100 $\mu\text{m}$ .
- Fiber size repartition of uninjured muscle from WT-control and *Bach1*-KO animals. Mean fiber CSA is shown in the inset (n=6 per group).
- The number of necrotic fibers relative to the regeneration area (in  $\text{mm}^2$ ) at day 8 post CTX-injury in control (non-BMT) and BMT chimeric muscle sections are shown (n=10 per group). In all graphs, bars and lines represent mean  $\pm$  SEM.

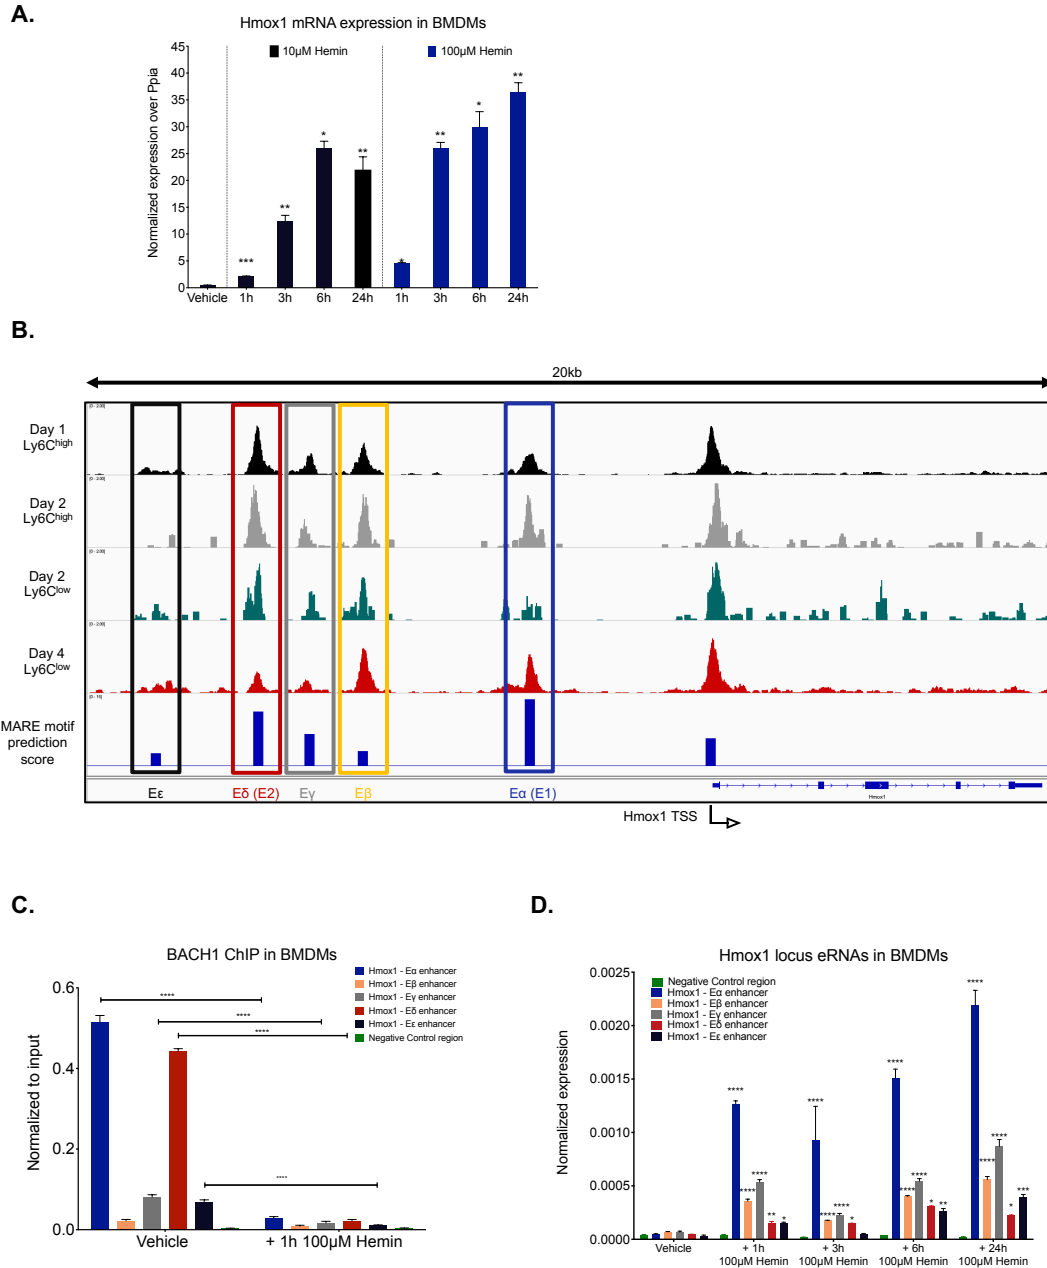

**Supplementary Fig. 4. Identification of novel regulatory elements around the *Hmox1* locus using ATAC-seq.**

- Hmox1* mRNA expression in WT BMDMs treated with various doses of hemin at the indicated timepoints (n=6 per group).
- Identification of possible enhancers upstream the *Hmox1* TSS (12kb) using muscle-derived macrophages ATAC-seq data. Putative enhancers are labeled by boxes and in the lower panel the motif prediction score for MARE is represented for each enhancer.
- BACH1-ChIP on the putative enhancer regions in BMDMs reveal BACH1 binding in all marked enhancers around the *Hmox1* locus with *Eα* and *Eδ* being the strongest ones. Heme treatment for 1 hour alleviates BACH1 binding validating our results (n=6 per group).
- Hmox1* enhancer RNA measurements in BMDMs upon heme treatment at various timepoints (n=6 per group).

In all bar graphs, bars represent mean  $\pm$  SEM.
